# Supplementary material for: Spin crossover and high spin electroneutral mononuclear iron(iii) Schiff base complexes involving terminal pseudohalido ligands
Source: Royal Society of Chemistry journal article supplement (doi:10.1039/c4nj01363h), 2014-10-28
Supplement: c4nj01363h1.pdf [file c4nj01363h1.pdf]

## Electronic Supplementary Information (ESI)

### Electroneutral Mononuclear Iron(III) Schiff Base Complexes involving Terminal Pseudohalido Ligands

P. Masárová, P. Zoufalý, J. Moncol, I. Nemeč, J. Pavlik, M. Gembický, Z. Trávníček, R. Boča, and I. Šalitroš

#### S1. UV-VIS spectra of the reported complexes

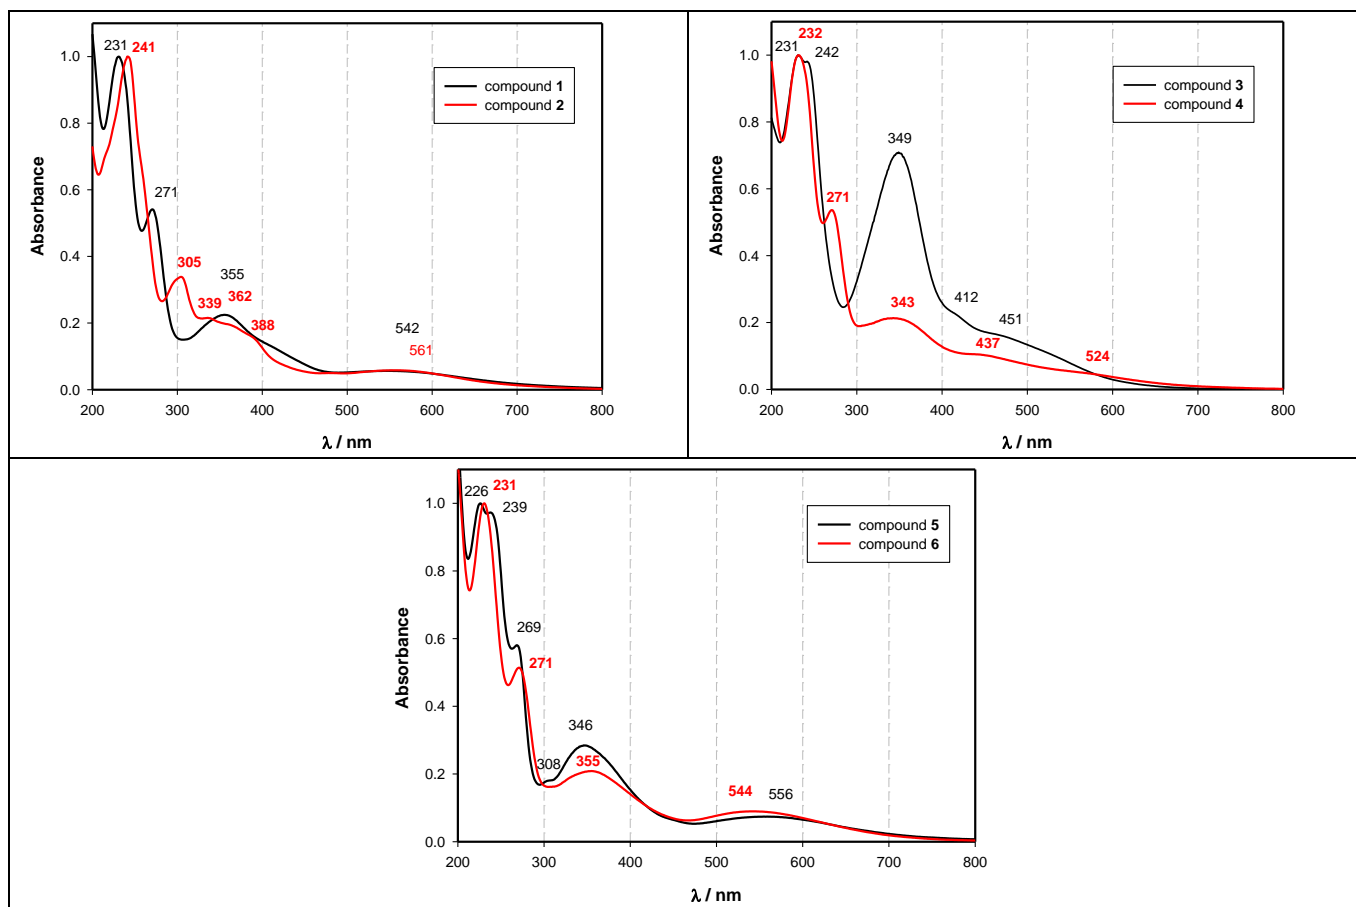

Figure S1 UV-VIS spectra of compound 1-6 in acetonitrile solution

## S2. Selected non-covalent interactions in the reported complexes

Compound **3** [ $Fe(L3)(NCS)$ ]

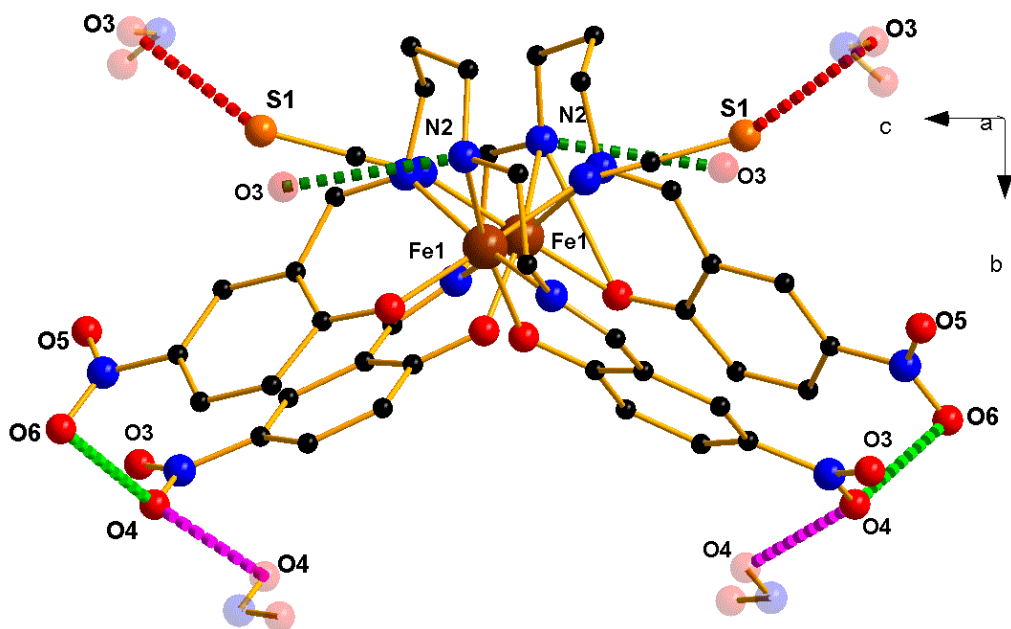

**Figure S2** A perspective view of non-covalent interactions in the crystal lattice of **3**. At 150 K corresponding bond distances are  $d(O3\cdots N2) = 3.071(3) \text{ \AA}$ ;  $d(O3\cdots S1) = 3.265(2) \text{ \AA}$ ;  $d(O4\cdots O6) = 2.922(3) \text{ \AA}$ ;  $d(O4\cdots O4) = 3.443(3) \text{ \AA}$  at 150 K.

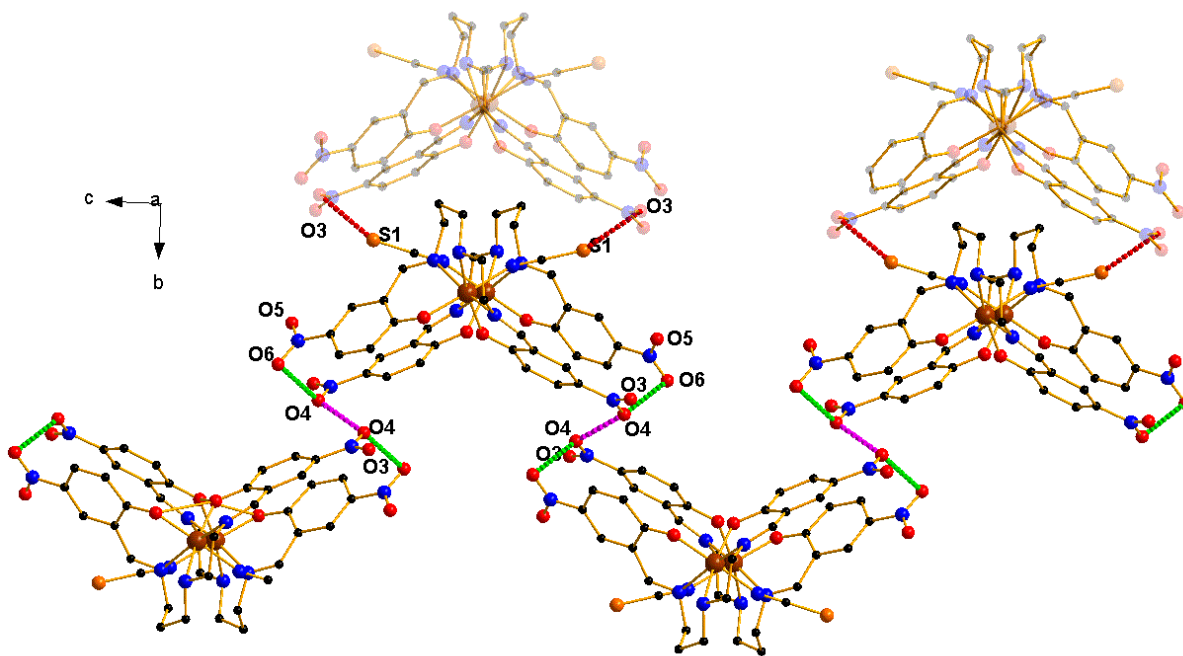

**Figure S3** A perspective view of non-covalent interactions in the crystal lattice of **3** along  $bc$  plane.  $d(O3\cdots N2) = 3.071(3) \text{ \AA}$ ;  $d(O3\cdots S1) = 3.265(2) \text{ \AA}$ ;  $d(O4\cdots O6) = 2.922(3) \text{ \AA}$ ;  $d(O4\cdots O4) = 3.443(3) \text{ \AA}$  at 150 K.

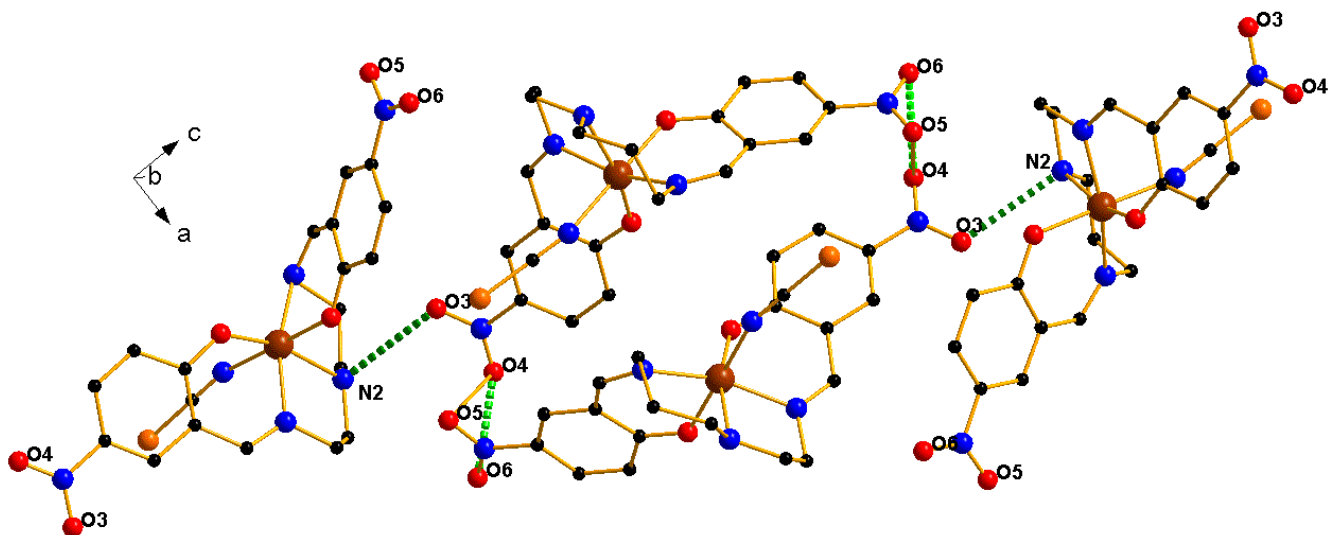

**Figure S4** A perspective view of non-covalent interactions in the crystal lattice of **3** along *ac* plane  $d(\text{O3}\cdots\text{N2}) = 3.071(3) \text{ \AA}$ ;  $d(\text{O3}\cdots\text{S1}) = 3.265(2) \text{ \AA}$ ;  $d(\text{O4}\cdots\text{O6}) = 2.922(3) \text{ \AA}$ ;  $d(\text{O4}\cdots\text{O4}) = 3.443(3) \text{ \AA}$  at 150 K.

*Compound 5 [Fe(L5)(NCS)]*

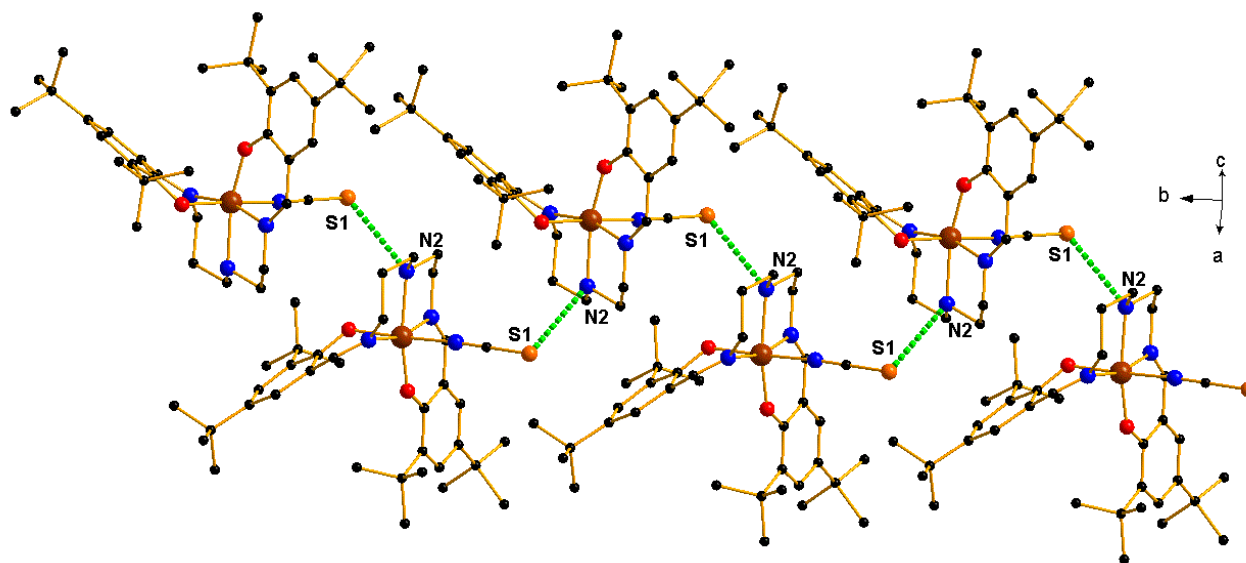

**Figure S7** A perspective view on  $\text{N}_{(\text{am})}\cdots\text{S1}$  hydrogen bonding in  $[\text{Fe}(\text{L5})\text{NCS}]$ . The corresponding donor $\cdots$ acceptor distances:  $d(\text{N2}\cdots\text{S1}) = 3.529(2) \text{ \AA}$  (150 K).

Compound 6 [Fe(L5)(NCS)]

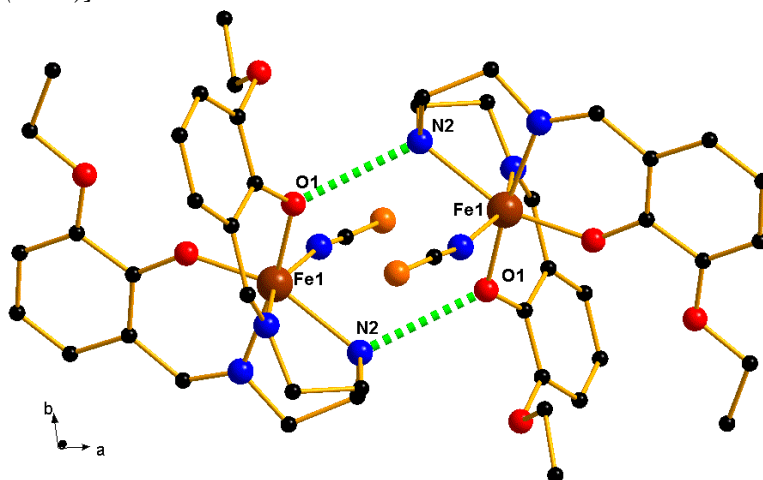

**Figure S8** A perspective view on  $N_{(am)}\cdots O_1$  hydrogen bonding in [Fe(L6)NCS]. Corresponding bond distances:  $d(N2\cdots O1) = 2.878(2)$  Å (100 K).

**S3 Collection of alternative fits of magnetic functions with sign reversal of the  $D$  parameter**

In following cases the sign of the parameter  $D$  was fixed opposite as found in the article (the absolute value was not limited), other parameters were unrestricted.

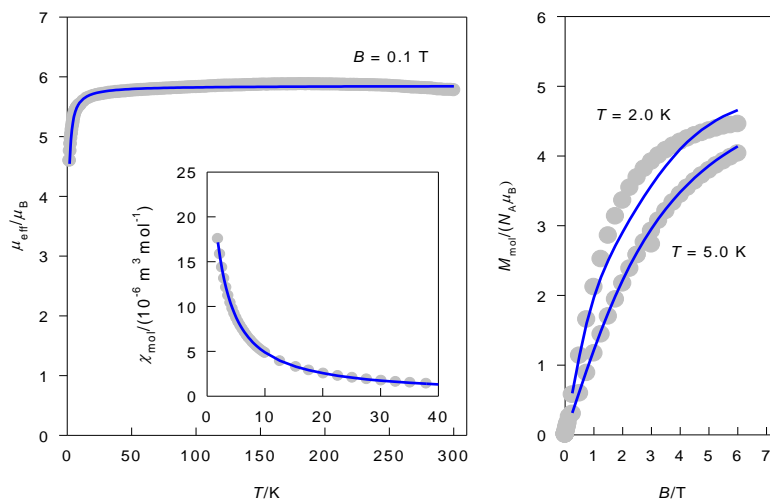

**Figure S9** Magnetic functions for **3**: effective magnetic moment vs temperature (left), magnetization vs magnetic field (right), magnetic susceptibility vs temperature (inset); grey circles: experimental data, solid line: fitted.

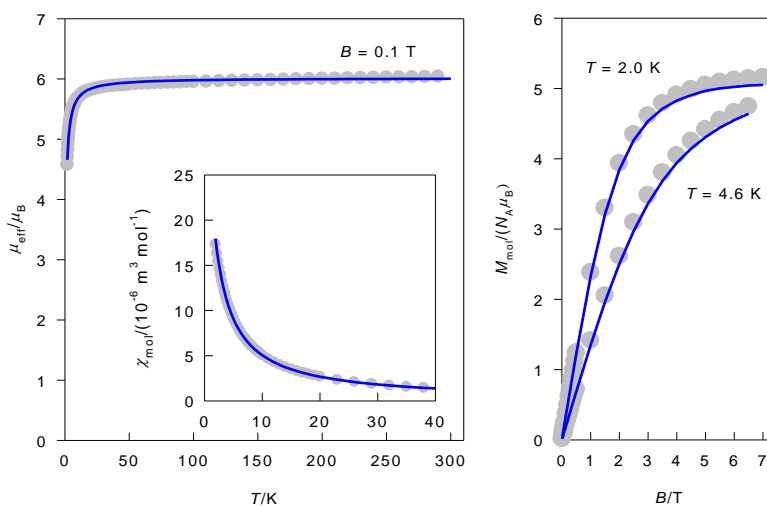

**Figure S10** Magnetic functions for **4**: effective magnetic moment vs temperature (left), magnetization vs magnetic field (right), magnetic susceptibility vs temperature (inset); grey circles: experimental data, solid line: fitted.

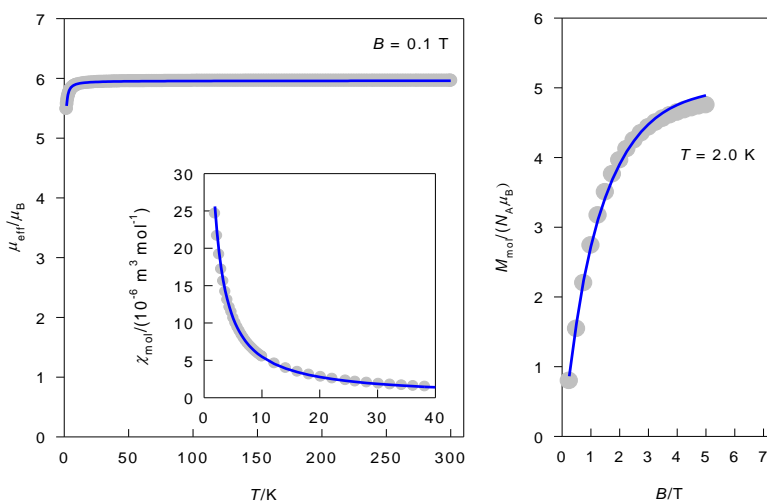

**Figure S11** Magnetic functions for **5**: effective magnetic moment vs temperature (left), magnetization vs magnetic field (right), magnetic susceptibility vs temperature (inset); grey circles: experimental data, solid line: fitted.

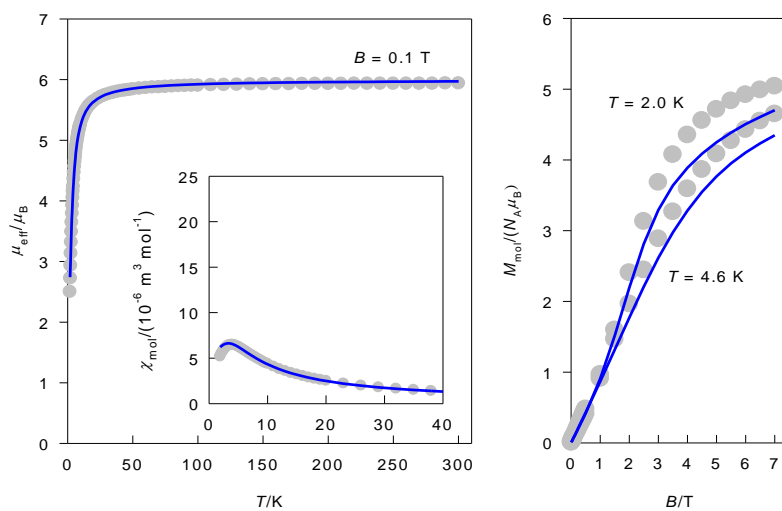

**Figure S12.** Magnetic functions for **6** per monomeric unit: effective magnetic moment vs temperature (left), magnetization vs magnetic field (right), magnetic susceptibility vs temperature (inset); grey circles: experimental data, solid line: fitted.

**Table S1.** Summary of alternative magnetic parameters for the high spin complexes **3-6** with opposite sign of the parameter  $D$

| Complex                              | $J/\text{cm}^{-1}$ | $g$  | $D/\text{cm}^{-1}$ | $(zj)/\text{cm}^{-1}$ | $R(\chi)/R(M)$ |
|--------------------------------------|--------------------|------|--------------------|-----------------------|----------------|
| <b>3</b> , [Fe(L3)(NCS)]             | –                  | 1.98 | -1.00              | -0.23                 | 0.012/0.055    |
| <b>4</b> , [Fe(L1)(N <sub>3</sub> )] | –                  | 2.03 | -0.11              | -0.28                 | 0.016/0.023    |
| <b>5</b> , [Fe(L5)(NCS)]             | –                  | 2.01 | -0.52              | -0.04                 | 0.020/0.021    |
| <b>6</b> , [Fe(L6)(NCS)]             | -0.56              | 2.03 | +1.00              | -0.05                 | 0.054/0.086    |
